1 **Efficient use of harvest data: An integrated population model for exploited**  
2 **animal populations**

3

4 Marlène Gamelon<sup>1,\*</sup>, Éric Baubet<sup>2</sup>, Aurélien Besnard<sup>3</sup>, Jean-Michel Gaillard<sup>4</sup>, Jean-  
5 Dominique Lebreton<sup>3</sup>, Laura Touzot<sup>4</sup>, Lara Veylit<sup>1</sup>, Olivier Gimenez<sup>3</sup>

6

7 <sup>1</sup>Centre for Biodiversity Dynamics, Department of Biology, Norwegian University of Science  
8 and Technology, 7491 Trondheim, Norway.

9 <sup>2</sup>Office National de la Chasse et de la Faune Sauvage, 2 Bis Rue des Religieuses, BP 19,  
10 52120 Châteauvillain, France.

11 <sup>3</sup>Centre d'Écologie Fonctionnelle et Évolutive, Université Montpellier, Université Paul Valéry  
12 Montpellier 3, EPHE, IRD, Montpellier, France.

13 <sup>4</sup>Université de Lyon, F-69000, Lyon; Université Lyon 1; CNRS, UMR 5558, Laboratoire de  
14 Biométrie et Biologie Évolutive, F-69622, Villeurbanne, France.

15

16 \*E-mail correspondence author: marlene.gamelon@ntnu.no

17

18 Running headline: Efficient use of harvest data

19 **Abstract**

20

21 1. Many populations are affected by hunting or fishing. Models designed to assess the  
22 sustainability of harvest management require accurate estimates of demographic parameters  
23 (e.g. survival, reproduction) hardly estimable with limited data collected on exploited  
24 populations. The joint analysis of different data sources with integrated population models  
25 (IPM) is an optimal framework to obtain reliable estimates for parameters usually difficult to  
26 estimate, while accounting for imperfect detection and observation error. The IPM built so far  
27 for exploited populations have integrated count-based surveys and catch-at-age data into age-  
28 class structured population models. But the age of harvested individuals is difficult to assess  
29 and often not recorded, and population counts are often not performed on a regular basis,  
30 limiting their use for the monitoring of exploited populations.

31 2. Here, we propose an IPM that makes efficient use of data commonly collected in exploited  
32 marine and terrestrial populations of vertebrates. As individual measures of body mass at both  
33 capture and death are often collected in fish and terrestrial game species, our model integrates  
34 capture-mark-recapture-recovery data and data collected at death into a body mass-structured  
35 population model. It allows the observed number of individuals harvested to be compared  
36 with the expected number and provides accurate estimates of demographic parameters.

37 3. We illustrate the usefulness of this IPM using an emblematic game species distributed  
38 worldwide, the wild boar *Sus scrofa*, as a case study. For this species that has increased in  
39 distribution and abundance over the last decades, the model provides accurate and precise  
40 annual estimates of key demographic parameters (survival, reproduction, growth) and of  
41 population size while accounting for imperfect detection and observation error.

42 4. To avoid an overexploitation of declining populations or an under-exploitation of  
43 increasing populations, it is crucial to gain a good understanding of the dynamics of exploited  
44 populations. When managers or conservationists have limited demographic data, the IPM  
45 offers a powerful framework to assess population dynamics. Being highly flexible, the  
46 approach is broadly applicable to both terrestrial and marine exploited populations for which  
47 measures of body mass are commonly recorded and more generally, to all populations  
48 suffering from anthropogenic mortality causes.

49

50 **KEYWORDS**

51 body mass-structured population model, exploited populations, harvest, hunting, integrated  
52 population model, *Sus scrofa*

## 53 1 | INTRODUCTION

54 Many animal populations are affected by commercial, recreational or subsistence  
55 harvest (Lebreton 2005b; Peres 2010; Ripple *et al.* 2016), i.e. by the removal of individuals  
56 through hunting or fishing. Managing such populations to keep the harvest at sustainable  
57 levels has long been a central purpose (Williams, Nichols & Conroy 2002). It is especially  
58 true in the current context of global change, as both experimental and observational evidence  
59 that harvest may act in synergy with other negative influences such as habitat destruction or  
60 disease outcome is accumulating (Camilo *et al.* 2007; Koons *et al.* 2015; Chen *et al.* 2015).  
61 Likewise, in the so-called harvest-interaction hypothesis, harvest might interact with  
62 population-level effects of climate change in both marine and terrestrial ecosystems. This  
63 interplay between harvest and climate effects may amplify environmentally induced  
64 fluctuations in population size and increases extinction risk, or, alternatively, dampen  
65 fluctuations and increase population growth rates (Gamelon, Sandercock & Sæther 2019).

66 Models designed to assess the sustainability of harvest management typically require  
67 accurate estimates of demographic parameters (e.g. survival, reproduction) and population  
68 size, which cannot be reliably estimated with limited data. Hence, in particular when  
69 demographic information is limited, the challenge is to make efficient use of available data to  
70 gain a good understanding of the dynamics of exploited populations and be able, in turn, to  
71 provide appropriate management recommendations. When several data types are available,  
72 even if each data type by itself provides limited information on demographic parameters, a  
73 combined analysis within an integrated population model (IPM) approach offers several  
74 advantages (see Schaub & Abadi 2011; Zipkin & Saunders 2018 for reviews). First, a  
75 combined analysis of different data sources always increases the precision of demographic  
76 estimates (for a proof, see Barker & Kavalieris 2001, and for an example, see table 1 in Péron  
77 *et al.* 2010 who compare parameter estimates and standard errors from a capture-mark-

78 recapture only and an integrated-modeling approach). Second, imperfect detection and  
79 observation error inherently associated with data sampled in the field (e.g. population counts)  
80 are accounted for. Third, the use of IPM allows some parameters that are difficult or  
81 impossible to estimate based on separate analyses to be satisfactorily estimated (for an  
82 example, see Péron *et al.* 2010).

83         From the eighties, the simultaneous analysis of different data sources with IPM has  
84 received growing interest in fisheries (see Maunder & Punt 2013 for a review). Later, IPM  
85 have been proposed as powerful tools to assess the dynamics of terrestrial vertebrate  
86 populations (e.g. Besbeas *et al.* 2002 for a study on northern lapwing *Vanellus vanellus* and  
87 grey heron *Ardea cinerea*) and more recently, they have been applied to exploited populations  
88 in terrestrial ecosystems (Gauthier *et al.* 2007; Arnold *et al.* 2018). Strikingly, IPM built on  
89 exploited populations usually integrate population surveys (of alive individuals), catch-at-age  
90 data and capture-mark-recapture-recovery (CMRR) data into age-structured population  
91 models (Methot Jr & Wetzel 2013; Arnold *et al.* 2018; Scheuerell *et al.* 2019). This state-of-  
92 the-art limited up-to-now the applicability of IPM for two reasons: i) the age of harvested  
93 individuals is often not available because its determination is challenging and generally  
94 involves expensive and time-demanding analyses. Instead, body mass at capture and/or death  
95 are commonly recorded; ii) information on numbers is rarely based on surveys of alive  
96 individuals. Instead, the number of individuals removed through exploitation is commonly  
97 recorded in many exploited species.

98         Here, we develop a widely applicable IPM relying on data commonly collected in  
99 exploited populations. We illustrate the usefulness of this approach based on the study of a  
100 population of an emblematic game species distributed worldwide, the wild boar *Sus scrofa*.  
101 This species has tremendously increased in abundance and distribution over the last decades  
102 (Massei *et al.* 2015), leading to important damage to crops and high risk of disease

103 transmission in Europe (see e.g. Schulz *et al.* 2019). Hunting is commonly assumed to help  
104 controlling wild boar expansion. Our model differs from previous IPMs applied to vertebrate  
105 populations in two respects: i) typical IPMs integrate data into an age-class structured  
106 population model. Instead, we build an IPM that integrates CMRR data and individual  
107 measures recorded at death into a body mass-structured population model; ii) both alive and  
108 dead individuals are considered in the model allowing us to compare the observed number of  
109 individuals shot by hunters in each body mass class to the numbers expected from the IPM.  
110 For each mass class, the model allows us to get accurate and precise annual estimates of  
111 demographic parameters (i.e. survival, reproduction) and of the number of alive individuals,  
112 while accounting for imperfect detection and observation error. Although we targeted wild  
113 boar as a case study in this work, the approach we propose can be reliably used for assessing  
114 population dynamics of any exploited size-structured population of vertebrates.

115

## 116 **2 | MATERIALS AND METHODS**

### 117 **2.1 | Demographic data collection**

118 We studied a wild boar population located in the 11,000 ha forest of Châteauvillain-  
119 Arc-en-Barrois in North-Eastern France (48°02'N, 4°55'E). Between 1991 and 2016, thanks  
120 to an intensive capture-mark-recapture program, 1,152 females were captured from March to  
121 September using traps, marked and released in their environment. For each capture event, we  
122 recorded the date of capture and body mass. Between October and February, wild boars were  
123 harvested. All females shot by hunters (previously marked or not) were weighed and their  
124 date of death was accurately recorded. No information was available for individuals that died  
125 from natural causes. As wild boar rut generally begins in mid-December, females are often

126 pregnant when shot during the hunting season. For pregnant females, the number of fetuses  
127 present in the uteri was recorded.

128 Three types of demographic data were thus available: CMRR data, hunting data and  
129 reproduction data.

130 i) CMRR data provided individual histories of 1,152 marked females together with the  
131 body mass at each capture (alive) and when shot (dead).

132 ii) Hunting data were the number of females shot by hunters in year  $t$ ,  $y_t$  together with  
133 their body mass at death ( $n=7,350$  over the study period).

134 iii) Reproduction data were the number of pregnant females shot in year  $t$ ,  $R_t$  ( $n = 811$   
135 over the study period) together with their body mass as well as the number of fetuses at  $t$ ,  $J_t$  ( $n$   
136  $= 4,344$  over the study period).

137 The Integrated Population Model (see Fig. 1 for a schematic representation of the IPM  
138 we built) was made of two types of components (Schaub & Abadi 2011; Zipkin & Saunders  
139 2018): i) a population model iterating a population vector, which links demographic rates (e.g.  
140 survival, reproduction) to the population vector; ii) probabilistic models and their likelihood  
141 functions for each of the three data sets (CMRR data, hunting data, reproductive data)  
142 separately. In turn, we obtained a joint likelihood combining these components.

143

## 144 **2.2 | Population model**

145 The population vector was considered each year at the end of the hunting season and  
146 before reproduction (pre-breeding census). From life history of wild boar and available data  
147 (data on body mass, not on age and data on numbers of individuals killed, not on numbers of

148 alive individuals), the population vector considered three classes of body mass (<30 kg  
149 (small), between 30 and 50 kg (medium) and >50 kg (large) (see Gamelon *et al.* 2012)) and  
150 two states (alive and shot by hunters) for each body mass-class. The population vector had  
151 thus 6 components: 3 body mass-classes  $\times$  2 states.

152 The stage-structured matrix population model allows stage-specific population sizes at  
153 year  $t+1$  to be estimated from stage-specific population sizes at year  $t$  and demographic rates  
154 (Caswell 2001). We built a female body mass-structured matrix model by considering the  
155 three classes of body mass previously defined and the two states: alive and shot by hunters.  
156 The output of this body mass-structured matrix model structured according to body mass can  
157 be directly compared with the observed distribution of hunted individuals among body mass-  
158 classes. Females can reproduce in all the three classes. Females may remain in the same body  
159 mass-class from one year to the next, with a probability  $p_{SS}$  for small females and  $p_{MM}$  for  
160 medium females. All large females remained in the large body mass class. Alternatively,  
161 small females can move to the medium body mass class with a probability  $p_{SM}$  or move  
162 directly to the largest class with a probability  $p_{SL}$  (such as  $p_{SL}=1-p_{SS}-p_{SM}$ ). Medium  
163 females can move to the next class with a probability  $p_{ML}$  (such as  $1-p_{MM}$ ). There was no  
164 backward transition towards a lighter body mass class. As wild boar females are sedentary  
165 (Truvé & Lemel 2003; Keuling *et al.* 2010), we assumed no immigration and emigration.

166 We defined  $N_{S,t}$  as the number of small females,  $N_{M,t}$  the number of medium females  
167 and  $N_{L,t}$  the number of large females alive in year  $t$ . To account for demographic stochasticity  
168 in survival processes, we used binomial processes to describe the number of females in each  
169 body mass class.



170 i. The number of small females alive in year  $t$   $N_{S,t}$  is the number of small females in  
 171 year  $t-1$  that remained small plus the number of small females produced by mature  
 172 females in year  $t-1$  ( $NewBorn_{t-1}$ ) that survived, such as:

$$173 \quad N_{S,t} \sim Bin(N_{S,t-1}, pSS_{t-1} \times Sn_{S,t-1} \times (I-h_{S,t-1})) + Bin(NewBorn_{t-1}, Sn_{S,t-1} \times (I-h_{S,t-1}) \times Spn_{t-1} \times piOs_{t-1})$$

174 (2)

175 where  $Sn_j$  is the survival probability during the first part of the year without hunting, and  $I-h_j$   
 176 the proportion of females that survived from hunting in the body mass class  $j$ . Survival  
 177 probability is defined as  $I-NM_j$ , with  $NM_j$  the natural mortality bringing together all causes of  
 178 death except hunting (e.g. diseases). The proportion of females shot by hunters in the class  $j$   $h_j$   
 179 is defined as  $\frac{MH_j}{1-NM_j}$ , with  $MH_j$  the hunting mortality. Assuming that natural mortality was  
 180 negligible during the hunting period (which is not a very stringent assumption as the  
 181 multiplicative relationship between natural survival and survival to hunting holds even with  
 182 some overlap in time between the two sources of mortality), at the end of the year, survival  
 183 probability for females in the body mass class  $j$  equals  $Sn_j \times (I-h_j) = (I-NM_j) \times (I-\frac{MH_j}{1-NM_j}) = I-$   
 184  $NM_j - MH_j$  (Lebreton 2005a).  $Spn$  is the post-natal survival probability (from birth to weaning)  
 185 and  $piOs$  the probability for newborn to remain in the small body mass class.

186 ii. The number of medium females alive in year  $t$   $N_{M,t}$  is the number of small females in  
 187 year  $t-1$  that entered the medium class, plus medium females in year  $t-1$  that remained  
 188 medium plus the newborn females produced by mature females in year  $t-1$  that  
 189 became medium ( $I-piOs$ ) and survived, such as:

$$190 \quad N_{M,t} \sim Bin(N_{S,t-1}, pSM_{t-1} \times Sn_{M,t-1} \times (I-h_{M,t-1})) + Bin(N_{M,t-1}, pMM_{t-1} \times Sn_{M,t-1} \times (I-h_{M,t-1})) + Bin$$

191 ( $NewBorn_{t-1}, Sn_{M,t-1} \times (I-h_{M,t-1}) \times Spn_{t-1} \times (I-piOs_{t-1}))$  (3).

192     iii.    The number of large females alive in year  $t$   $N_{L,t}$  is the number of small and medium  
 193            females in year  $t-1$  that entered the large class, plus large females in year  $t-1$  that  
 194            survived, such as:

$$195 \quad N_{L,t} \sim \text{Bin} (N_{S,t-1}, pSL_{t-1} \times Sn_{L,t-1} \times (1-h_{L,t-1})) + \text{Bin} (N_{M,t-1}, pML_{t-1} \times Sn_{L,t-1} \times (1-h_{L,t-1})) + \text{Bin} (N_{L,t-1},$$

$$196 \quad Sn_{L,t-1} \times (1-h_{L,t-1})) \quad (4).$$

197    We used a Poisson distribution for the annual number of newborn females produced by small,  
 198    medium and large females, such as:

$$199 \quad \text{NewBorn}_t \sim \text{Poisson} (N_{S,t} \times BP_{S,t} \times LS_{S,t} \times 0.5 + N_{M,t} \times BP_{M,t} \times LS_{M,t} \times 0.5 + N_{L,t} \times BP_{L,t} \times LS_{L,t} \times 0.5)$$

$$200 \quad (5)$$

201    with  $BP_{j,t}$  the annual proportion of breeding females and  $LS_{j,t}$  the annual litter size of each  
 202    body mass class  $j$ . We assumed a balanced sex ratio at birth (Servanty et al. 2007).

203            In addition to the number of females alive in each body mass class, we estimated the  
 204    annual body mass-specific numbers of females that were shot  $NH_{S,t}$ ,  $NH_{M,t}$  and  $NH_{L,t}$ :

205     i.    The number of small females shot by hunters in year  $t$   $NH_{S,t}$  is the number of small  
 206            females in year  $t-1$  that remained small and survived from natural causes but were  
 207            shot during the hunting season, plus the number of small females produced by mature  
 208            females in year  $t-1$  also shot, such as:

$$209 \quad NH_{S,t} \sim \text{Bin} (N_{S,t-1}, pSS_{t-1} \times Sn_{S,t-1} \times h_{S,t-1}) + \text{Bin} (\text{NewBorn}_{t-1}, Sn_{S,t-1} \times h_{S,t-1} \times Spn_{t-1} \times piOs_{t-1}) \quad (6).$$

210     ii.    Similarly, the number of medium females shot by hunters in year  $t$   $NH_{M,t}$  is:

$$211 \quad NH_{M,t} \sim \text{Bin} (N_{S,t-1}, pSM_{t-1} \times Sn_{M,t-1} \times h_{M,t-1}) + \text{Bin} (N_{M,t-1}, pMM_{t-1} \times Sn_{M,t-1} \times h_{M,t-1}) + \text{Bin}$$

$$212 \quad (\text{NewBorn}_{t-1}, Sn_{M,t-1} \times h_{M,t-1} \times Spn_{t-1} \times (1-piOs_{t-1})) \quad (7);$$

213     iii.    The number of large females shot by hunters in year  $t$   $NH_{L,t}$  is:

$$214 \quad NH_{L,t} \sim \text{Bin}(N_{S,t-1}, pSL_{t-1} \times Sn_{L,t-1} \times h_{L,t-1}) + \text{Bin}(N_{M,t-1}, pML_{t-1} \times Sn_{L,t-1} \times h_{L,t-1}) + \text{Bin}(N_{L,t-1}, Sn_{L,t-1} \\ 215 \quad \times h_{L,t-1}) \quad (8).$$

216

### 217 **2.3 | Model for hunting data**

218 Hunting data consisted of the annual numbers of females shot by hunters by body  
219 mass classes (small, medium and large), denoted as  $y_{S,t}$ ,  $y_{M,t}$  and  $y_{L,t}$ , respectively. For these  
220 data, we used the likelihood of a state-space model (de Valpine & Hastings 2002), which  
221 consists of a process model (i.e. the population model previously described, that is the  
222 population size as a function of demographic rates and the population size the preceding year)  
223 and an observation model. The observation model describes the link between the hunting data  
224  $y_{S,t}$ ,  $y_{M,t}$  and  $y_{L,t}$  and the true number of females shot by hunters in the population ( $NH_{S,t}$ ,  $NH_{M,t}$   
225 and  $NH_{L,t}$ ) (yellow part, Fig. 1). For each body mass class  $j$ , we assumed that:  $y_{j,t}$   
226  $\sim \text{Normal}(NH_{j,t}, \tau_{j,t})$  truncated to positive values, with  $\tau_{j,t} = \frac{1}{\sigma_j^2 \times y_{j,t}^2}$ , where  $\sigma_j^2$  is the term we are  
227 estimating.  $\tau_{j,t}$  is the observation error and incorporates both errors in hunting data and lack of  
228 fit of the state equations to the true dynamics of the population (see p. 230 in Schaub & Abadi  
229 2011). Note the trick often used in JAGS that consists in defining the distributions by their  
230 precision  $\tau_{j,t}$  rather than their variance  $\sigma_j^2$ , the precision being the inverse of the variance. The  
231 likelihood of the state-space model is then the product of the likelihood of the process and the  
232 observation equations. The state-space likelihood for hunting data already includes all  
233 parameters we want to estimate but they are hardly estimable based on hunting data alone and  
234 require additional information coming from CMRR and reproduction data.

## 235 **2.4 | Model for capture-mark-recapture-recovery data**

236 CMRR data were analysed using a multistate model (see Lebreton *et al.* 2009 for a  
237 review) that allows natural mortality  $NM$  to be estimated separately from hunting mortality  
238  $MH$  (Lebreton, Almeras & Pradel 1999; Gamelon *et al.* 2012) for each body mass class (grey  
239 part, Fig. 1). We described the fate of an individual using ten states (see Appendix S1). States  
240 1, 2 and 3 were for individuals alive in the small, medium and large body mass classes,  
241 respectively. States 4, 5 and 6 were for individuals just shot, again in the three body mass  
242 classes, respectively. States 7, 8 and 9 were for individuals that recently died from natural  
243 causes, again in the three body mass classes, respectively. The state “dead from a natural  
244 cause” cannot be observed because no information was available for individuals that did not  
245 die from hunting. State 10 corresponded to individuals already dead. The state “already dead”  
246 cannot be observed either but brought together all the dead individuals. To account for the  
247 dependency between states (i.e. from year  $t$  to  $t+1$ , individuals either survive, die shot by  
248 hunters or die from natural causes, see Appendix S1), we used a Dirichlet distribution to  
249 model the transitions between states thus ensuring that the sum of these probabilities always  
250 equals to 1. The parameters in the multistate model were annual natural mortality  $NM_{j,t}$  and  
251 hunting mortality  $MH_{j,t}$  for each body mass class  $j$ . Moreover, yearly transition probabilities  
252 from one body mass class to the next (i.e.  $pSS_t$ ,  $pSM_t$ ,  $pSL_t$ ,  $pMM_t$ ,  $pML_t$ ) were estimated. To  
253 account for the dependency between transition probabilities (i.e.  $pSL_t = 1 - pSS_t - pSM_t$ ), we used  
254 a Dirichlet distribution to model the transitions from the small body mass class to the others.  
255 This ensures that the sum of the probabilities (i.e.  $pSS_t + pSM_t + pSL_t$ ) always equals to 1.  
256 Regarding the observation process, if an individual was alive, it could be recaptured with  
257 probability  $p$  or not recaptured with probability  $1-p$ ; if an individual just died from hunting, its  
258 death could be reported “dead recovery” with probability  $r$  or not reported with probability  $1-$

259 *r*. Recapture and recovery probabilities were also time and body mass-class dependent (see  
260 Appendix S2 and S3).

261

## 262 **2.5 | Model for reproduction data**

263       Reproduction data consisted of the annual numbers of pregnant females shot by body  
264 mass classes (small, medium and large), denoted as  $R_{S,t}$ ,  $R_{M,t}$  and  $R_{L,t}$ , respectively and the  
265 annual numbers of fetuses counted by body mass classes, denoted as  $J_{S,t}$ ,  $J_{M,t}$  and  $J_{L,t}$ ,  
266 respectively. We assumed that the number of fetuses per body mass class  $J_{j,t}$  is Poisson  
267 distributed such as:  $J_{j,t} \sim \text{Poisson}(R_{j,t} \times LS_{j,t})$ , where  $LS_{j,t}$  is the term we are estimating, that is  
268 the litter size for a female belonging to the body mass class  $j$  (blue part, Fig. 1).

269

## 270 **2.6 | Model implementation**

271       Assuming independence among the datasets, the likelihood of the IPM was the  
272 product of the likelihoods of the three different datasets (Besbeas *et al.* 2002; Kéry & Schaub  
273 2012): hunting data, CMRR data and reproduction data. The IPM was fit within the Bayesian  
274 framework and we used non-informative priors for all the parameters. We only constrained  $\sigma_j$   
275 in the state-space model to be small using a Uniform distribution between 0 and 0.1, so that  
276 the observation errors  $\tau_{j,t} = \frac{1}{\sigma_j^2 \times y_{j,t}^2}$  can be large. Markov chain Monte Carlo (MCMC)  
277 simulation was used for parameter estimation. All the parameters described in Fig. 1 were  
278 estimated within the IPM, even parameters difficult to estimate and often assessed from  
279 expert opinion such as *Spn* and *piOs* (see Gamelon *et al.* 2012). The analyses were  
280 implemented using JAGS (Plummer 2003) version 4.3.0 called from R version 3.4.3 (R

281 Development Core Team 2017) with package rjags (Plummer 2016). The JAGS code for  
282 fitting the IPM is available in Appendix S3.

283 To assess convergence, we ran three independent chains for 230,000 MCMC  
284 iterations, with an adaptation of 180,000 iterations thinning every 100th observation resulting  
285 in 1,500 posterior samples. We used the Brooks and Gelman diagnostic  $R^{\hat{}}_{\text{diag}}$  to assess the  
286 convergence of the simulations and used the rule  $R^{\hat{}}_{\text{diag}} < 1.2$  to determine whether convergence  
287 has been reached (Brooks & Gelman 1998). Convergence was reached for most of the nodes  
288 except for four years (1996-1999) in which not all parameters had converged. To ensure that  
289 the priors for initial population sizes do not influence estimates of demographic rates and  
290 body mass-specific numbers the first year of the study (i.e., in 1991), only the years between  
291 1992 and 2016 were included in the analyses.

292

### 293 **3 | RESULTS**

#### 294 **3.1 | Recapture, recovery and mortality probabilities**

295 Estimated recapture probabilities fluctuated a lot through years, from 0.04 to 0.74 for  
296 small females (mean  $p_S=0.36$ ), from 0.03 to 0.82 for medium females (mean  $p_M=0.38$ ) and  
297 from 0.002 to 0.62 for large females (mean  $p_L=0.10$ ). These high fluctuations of the average  
298 recapture probabilities over years are consistent with earlier studies (see Appendix C in  
299 Servanty *et al.* 2010). In accordance with previous work (Toïgo *et al.* 2008; Servanty *et al.*  
300 2010; Gamelon *et al.* 2011), dead recovery reporting probabilities were high for all body mass  
301 classes, ranging from 0.75 to 0.97 for small females (mean  $r_S=0.90$ ), from 0.79 to 0.96 for  
302 females in the medium body mass class (mean  $r_M=0.88$ ) and from 0.74 to 0.93 for large  
303 females (mean  $r_L=0.84$ ). Mortality probability also fluctuated over the study period (Fig. 2  
304 A,B). As expected for this heavily hunted population, hunting mortality  $MH$  was much higher

305 than natural mortality  $NM$  for small and medium females. Interestingly, the estimate of the  
306 mean post-natal survival was 0.60 [min=0.22; max=0.88] over the study period, and thus  
307 close to the value generally set by expert opinion (0.75, see e.g. Gamelon *et al.* 2012) .

308

### 309 **3.2 | Transition probabilities among body-mass classes**

310 Females in the small body mass class had an estimated probability of 0.48 to remain in  
311 this class on the average ( $p_{SS}$ ) (Fig. 2C). Alternatively, they moved to the medium-sized class  
312 with an estimated probability  $p_{SM}$  equal to 0.19 on the average, and to the large-sized class  
313 with a probability  $p_{SL}$  of 0.33. Females in the medium body mass class had an estimated  
314 probability of 0.41 to enter the large class on the average ( $p_{ML}$ ), other medium females  
315 remaining in the medium-sized class ( $p_{MM}$ ). Newborn females had an estimated probability  
316 of 0.88 [min=0.56; max=0.98] to remain in the small body mass class ( $p_{iOs}$ ) on the average,  
317 this probability being usually set to 0.60 by expert opinion (see e.g. Gamelon *et al.* 2012).

318

### 319 **3.3 | Reproduction**

320 For reproduction parameters, litter sizes  $LS$  were strongly body mass-specific, being the  
321 largest for large females (mean  $LS_L=6.08$  young) and the smallest for females of the small-  
322 sized class (mean  $LS_S=4.21$  young) (Fig. 3). These results are in accordance with previous  
323 studies (Gamelon *et al.* 2013). As for mortality probabilities, litter sizes fluctuated a lot over  
324 the study period, from 1.79 to 7.69 young produced for small females ( $LS_S$ ), from 3.91 to 7.50  
325 young for females in the medium weight class ( $LS_M$ ) and from 4.97 to 7 young for large  
326 females ( $LS_L$ ). Breeding proportions, i.e. the proportion of breeding females among those in  
327 each body mass class, fluctuated over years, especially for females in the small body mass

328 class. These probabilities ranged from 0.36 to 0.84 (mean  $BP_S=0.58$ ) for small females, from  
329 0.43 to 0.65 (mean  $BP_M=0.53$ ) for medium females, and from 0.48 to 0.61 (mean  $BP_L=0.53$ )  
330 for large females.

331

### 332 **3.4 | Population sizes**

333 High annual fluctuations in mortality, transition between body mass classes and  
334 reproductive rates translated to high variation in population size over years (Fig. 4). Each  
335 year, with a mean of  $NH_S=143$  females, most of the females removed from hunting belonged  
336 to the small-sized class (Fig. 4A). The mean number of females shot by hunters in the  
337 medium class  $NH_M$  was estimated to be 81, whereas they were very few large females in the  
338 hunting bags (mean  $NH_L=35$ ). Noticeably, the numbers of females shot in each body mass  
339 class expected from the IPM was very close to the observed numbers  $y_j$  (dots in Fig. 4A).  
340 Observation errors  $\sigma$  were estimated at 0.096 for small and medium females and 0.099 for  
341 large females. In terms of numbers of females alive in the population, small females  
342 constituted the largest part of the population (mean number of small females  $N_S=290$ ),  
343 followed by medium (mean  $N_M=77$ ) and then large females (mean  $N_L=36$ ) (Fig. 4B).

344

## 345 **4 | DISCUSSION**

346 We develop here an IPM that makes efficient use of data commonly collected in  
347 exploited populations, i.e. body mass at captures/death as well as number of individuals  
348 removed by harvesting. Our model makes it possible to directly compare the observed and the  
349 expected number of individuals shot. It also provides accurate and precise estimates of key  
350 demographic parameters, including some that cannot be estimated from separate analyses.



351 Using a wild boar population as a case study, we demonstrate that this framework is a  
352 powerful tool to gain a good understanding of the dynamics of exploited populations.

353

#### 354 **4.1 | A comprehensive picture of population dynamics**

355 In accordance with previous work (Toigo *et al.* 2008; Gamelon *et al.* 2011), we  
356 showed that hunting mortality probabilities  $MH$  are high for all body mass classes.  
357 Conversely, natural mortality  $NM$  was low (Fig. 2 A,B). This is expected among ungulates  
358 where the average natural adult survival probability  $S_n$  often exceed 0.95 in females (Gaillard  
359 *et al.* 2000). These hunting and natural mortality patterns are in accordance with other hunted  
360 wild boar populations (see Gamelon 2019 for a review). Our IPM thus confirms that hunting  
361 is an important driver of wild boar population dynamics. Regarding to reproduction  
362 parameters, wild boar is a highly fecund species, being able to produce large litters (Fig. 3) as  
363 early as their first year of life (Servanty *et al.* 2009) at a body mass lower than 30 kg (small  
364 mass-class). Together with reduced survival due to hunting, this leads to a short generation  
365 time, i.e. a low mean age of mothers at childbirth (Gaillard *et al.* 2005, 2016) close to two  
366 years, whereas it is close to six years for similar-sized ungulates (Servanty *et al.* 2011). This  
367 unusual life history among ungulates (Focardi *et al.* 2008), characterized with a fast turnover  
368 of individuals in the population, explains why the number of individuals in the population did  
369 not collapse (Fig. 4B) during the study period despite such a high hunting pressure, and why  
370 younger/lighter females constitute more than 50% of the individuals alive. By analyzing  
371 simultaneously CMRR data, reproductive data and hunting data, and by estimating jointly all  
372 the demographic parameters, our IPM offers a comprehensive picture of the underlying  
373 demographic mechanisms allowing this population not to collapse over the last 25 years  
374 despite a high hunting pressure.

## 375 **4.2 | Estimates for demographic parameters hardly measurable in the field**

376           The size of exploited populations is generally poorly known, and the IPM allows us to  
377 get accurate and precise estimates even in the absence of surveys of the number of individuals  
378 alive, which are usually needed to make relevant management recommendations.  
379 Interestingly, the model also allows us to estimate some growth parameters that are difficult to  
380 measure in the field, because they would require multiple captures of the same individuals  
381 over their lifespan. We found marked year-to-year variation in the probability for a female to  
382 remain in the same body mass class or enter a heavier body mass class (Fig. 2C). A large  
383 body of empirical evidence shows that increasing density is generally associated with reduced  
384 body mass in large herbivores (Bonenfant *et al.* 2009). Fluctuations in the strength of density  
385 dependence in body growth could explain such among-year variation in transition  
386 probabilities. Factors affecting transitions between body mass classes remain to be carefully  
387 explored, offering exciting avenues of research. Likewise, the IPM allowed us to get annual  
388 estimates of post-natal survival, a parameter often tricky to estimate empirically. For instance,  
389 Baubet *et al.* (2009) aimed to tag piglets inside their birth nest to assess post-natal survival  
390 from birth to weaning. They failed in this task not only because of expected difficulties to  
391 locate the birth nests, but also because it induced abandonment of the piglets after tagging. By  
392 jointly analysing different data sources, the IPM is a powerful tool to achieve such a goal.

393

## 394 **4.3 | A framework based on data commonly collected in exploited populations**

395           To make harvest sustainable, i.e. avoid overharvest of declining populations or avoid  
396 applying too low harvest rate to increasing populations, the dynamics of exploited populations  
397 should be fully understood. In frequent situations where data are limited, it might be a tricky  
398 task. Our IPM is not solely a powerful tool to understand the dynamics of increasing wild

399 boar populations, but it is clearly applicable to many other populations in both terrestrial and  
400 marine environments. For instance, a lot of commercially important marine fish species are  
401 subject to strong harvesting (Pauly *et al.* 2002; Hutchings & Reynolds 2004). The IPM can be  
402 a suitable tool to anticipate the collapse of some of them (Hutchings & Myers 1994; Myers,  
403 Hutchings & Barrowman 1997) by making efficient use of the limited data available (see  
404 Maunder 2004; Saunders, Cuthbert & Zipkin 2018 for the use of IPM in prospective  
405 analyses).

406         The use of IPM as a management tool is not novel in fisheries (see Maunder & Punt  
407 2013 for a review) but they are to date based on age-structured population models. However,  
408 fish are indeterminate growers for which demographic parameters are usually strongly mass-  
409 dependent. Moreover, while taking reliable mass measurements of animals killed by humans  
410 is straightforward, information on age is more cumbersome and often inaccurate and thus  
411 recorded in very few populations only. Even in determinate growers such as birds and  
412 mammals, evidence is accumulating that body mass is a crucial structuring factor of  
413 population dynamics (Gaillard *et al.* 2000 for a review on large herbivores; see Coulson,  
414 Tuljapurkar & Childs 2010 for a case study on Soay sheep *Ovis aries*), making biologically  
415 relevant the use of body mass-structured models in IPM for a large range of exploited  
416 populations of vertebrates. More generally, our framework based on a body mass-structured  
417 model adds to the spate of studies that have recently flourished in the literature showing that  
418 trait-based approaches (such as body mass) and demographic approaches are intertwined  
419 (Salguero-Gómez *et al.* 2018; Smallegange & Berg 2019). Another clear advantage of our  
420 IPM is the inclusion of the number of dead individuals in the body mass-structured population  
421 model, whereas all the IPMs built so far only included the number of individuals alive in a  
422 population model (Caswell 2001). In exploited populations, getting information on the  
423 number of individuals alive is challenging whereas information on the number of individuals

424 killed (by hunting or fishing) is often available. This number is even almost perfectly known  
425 in our population. With the inclusion of information related to hunting bags, our IPM renders  
426 possible a direct comparison between observed and predicted numbers of individuals shot in  
427 each body-mass class, a crucial demographic information in exploited populations.

428

#### 429 **4.4 | Possible extensions**

430 The use of the number of individuals harvested in our IPM could be modified to the  
431 use of proportions. A classical case is that of duck hunting, in which programs for collecting  
432 samples of wings of individuals shot make it possible to estimate the proportion of first-year  
433 and after first-year (i.e. adult) individuals of both sexes in the harvest (Raftovich, Chandler &  
434 Fleming 2018). Such estimates of age-and sex structures among dead individuals have been  
435 used up to now in an ad hoc fashion to match model predictions (Holopainen *et al.* 2018). The  
436 analysis of such data based on an IPM would certainly greatly improve our knowledge and  
437 understanding of the differences in vulnerability to hunting between young and adults and  
438 between sexes in duck populations.

439 Another possible straightforward extension of our IPM could be the modification of  
440 the number and size of the body mass classes. Beyond body mass, the IPM is generalizable to  
441 all kinds of states, such as breeder/non breeder which is a commonly reported state in CMR  
442 studies on birds (see e.g. Pardo, Barbraud & Weimerskirch 2014 for a multistate model on  
443 wandering albatross *Diomedea exulans*). Beyond mortality due to hunting and fishing, the  
444 IPM can also be expanded to all forms of anthropogenic mortalities (see e.g. Chevallier *et al.*  
445 2015 for mortality induced by electrocution in Bonelli's eagle *Aquila fasciata*). Finally, while  
446 we used non-informative priors and allowed all the parameters to be estimated within the

447 IPM, it is straightforward to integrate a priori biological knowledge by setting some  
448 parameters to known values or by using informative priors.

449

## 450 **Conclusions**

451 The recent methodological advances, such as the introduction of MCMC that have  
452 highly contributed to the expansion of IPM, allowed us to propose an IPM that makes  
453 efficient use of (limited) harvest data for the monitoring of exploited populations. The model  
454 is flexible and can be adapted to the life history and the data available for the population of  
455 interest. This model that integrates commonly collected data in marine and terrestrial  
456 exploited populations is therefore widely applicable.

457

## 458 **ACKNOWLEDGMENTS**

459 Wild boar data collection was performed and granted by the French National Agency for  
460 Wildlife and Hunting (ONCFS). We are grateful to all those who helped marking and  
461 collecting harvested wild boar, in particular Serge Brandt, Eveline Nivois and Cyril Rousset,  
462 to the Office National des Forêts and to F. Jehlé who allowed us to work on the study area.  
463 This work was supported by the Research Council of Norway through its Centre of  
464 Excellence funding scheme, Project Number 223257.

465

466 AUTHOR 'S CONTRIBUTIONS

467 EB contributed to data collection. MG, EB, AB, JMG, JDL and OG conceived the study. MG  
468 conducted the analyses with insights from OG, wrote the first draft and all authors contributed  
469 to revisions of the initial manuscript.

470

471 DATA AVAILABILITY

472 The data supporting the results will be archived in an appropriate public repository in Dryad,  
473 should the manuscript be accepted.

474

475 REFERENCES

- 476 Arnold, T.W., Clark, R.G., Koons, D.N. & Schaub, M. (2018) Integrated population models  
477 facilitate ecological understanding and improved management decisions. *The Journal*  
478 *of Wildlife Management*, **82**, 266–274.
- 479 Barker, R.J. & Kavalieris, L. (2001) Efficiency gain from auxiliary data requiring additional  
480 nuisance parameters. *Biometrics*, **57**, 563–566.
- 481 Baubet, E., Servanty, S. & Brandt, S. (2009) Tagging piglets at the farrowing nest in the wild:  
482 some preliminary guidelines. *Acta Silvatica et Lignaria Hungarica*, **5**, 159–166.
- 483 Besbeas, P., Freeman, S.N., Morgan, B.J.T. & Catchpole, E.A. (2002) Integrating mark-  
484 recapture-recovery and census data to estimate animal abundance and demographic  
485 parameters. *Biometrics*, **58**, 540–547.
- 486 Bonenfant, C., Gaillard, J., Coulson, T., Festa-Bianchet, M., Loison, A., Garel, M., Loe, L.E.,  
487 Blanchard, P., Pettorelli, N., Owen-Smith, N., Du Toit, J. & Duncan, P. (2009)  
488 Empirical evidence of density-dependence in populations of large herbivores.  
489 *Advances in Ecological Research* (ed H. Caswell), pp. 313–357. Academic Press.
- 490 Brooks, S.P. & Gelman, A. (1998) General methods for monitoring convergence of iterative  
491 simulations. *Journal of Computational and Graphical Statistics*, **7**, 434–455.
- 492 Camilo, C., Metzger, R., Rollo, A. & Myers, R.A. (2007) Experimental simulations about the  
493 effects of overexploitation and habitat fragmentation on populations facing

- 494 environmental warming. *Proceedings of the Royal Society B: Biological Sciences*,  
495 **274**, 1023–1028.
- 496 Caswell, H. (2001) *Matrix Population Models: Construction, Analysis, and Interpretation*.  
497 Sinauer Associates.
- 498 Chen, S., Fan, Z., Roby, D.D., Lu, Y., Chen, C., Huang, Q., Cheng, L. & Zhu, J. (2015)  
499 Human harvest, climate change and their synergistic effects drove the Chinese Crested  
500 Tern to the brink of extinction. *Global Ecology and Conservation*, **4**, 137–145.
- 501 Chevallier, C., Hernández-Matías, A., Real, J., Vincent-Martin, N., Ravayrol, A. & Besnard,  
502 A. (2015) Retrofitting of power lines effectively reduces mortality by electrocution in  
503 large birds: an example with the endangered Bonelli's eagle. *Journal of Applied  
504 Ecology*, **52**, 1465–1473.
- 505 Coulson, T., Tuljapurkar, S. & Childs, D.Z. (2010) Using evolutionary demography to link  
506 life history theory, quantitative genetics and population ecology. *Journal of Animal  
507 Ecology*, **79**, 1226–1240.
- 508 Focardi, S., Gaillard, J.-M., Ronchi, F. & Rossi, S. (2008) Survival of wild boars in a variable  
509 environment: unexpected life-history variation in an unusual ungulate. *Journal of  
510 Mammalogy*, **89**, 1113–1123.
- 511 Gaillard, J.-M., Festa-Bianchet, M., Yoccoz, N.G., Loison, A. & Toïgo, C. (2000) Temporal  
512 variation in fitness components and population dynamics of large herbivores. *Annual  
513 Review of Ecology and Systematics*, **31**, 367–393.
- 514 Gaillard, J.-M., Lemaître, J.-F., Berger, V., Bonenfant, C., Devillard, S., Douhard, M.,  
515 Gamelon, M., Plard, F. & Lebreton, J.-D. (2016) Axes of variation in life histories.  
516 *Encyclopedia of Evolutionary Biology*, Elsevier, pp. 312–323. R. M. Kliman, Oxford,  
517 UK.
- 518 Gaillard, J.-M., Yoccoz, N.G., Lebreton, J.-D., Bonenfant, C., Devillard, S., Loison, A.,  
519 Pontier, D. & Allaine, D. (2005) Generation time: a reliable metric to measure life-  
520 history variation among mammalian populations. *The American Naturalist*, **166**, 119–  
521 123.
- 522 Gamelon, M. (2019) Hunting, predation and senescence in boars. *Reference Module in  
523 Biomedical Sciences*
- 524 Gamelon, M., Besnard, A., Gaillard, J.-M., Servanty, S., Baubet, E., Brandt, S. & Gimenez,  
525 O. (2011) High hunting pressure selects for earlier birth date: wild boar as a case  
526 study. *Evolution*, **65**, 3100–3112.
- 527 Gamelon, M., Gaillard, J.-M., Baubet, E., Devillard, S., Say, L., Brandt, S. & Gimenez, O.  
528 (2013) The relationship between phenotypic variation among offspring and mother  
529 body mass in wild boar: evidence of coin-flipping? *Journal of Animal Ecology*, **82**,  
530 937–945.
- 531 Gamelon, M., Gaillard, J.-M., Servanty, S., Gimenez, O., Toïgo, C., Baubet, E., Klein, F. &  
532 Lebreton, J.-D. (2012) Making use of harvest information to examine alternative

- 533 management scenarios: a body weight-structured model for wild boar. *Journal of*  
534 *Applied Ecology*, **49**, 833–841.
- 535 Gamelon, M., Sandercock, B.K. & Sæther, B.-E. (2019) Does harvesting amplify  
536 environmentally induced population fluctuations over time in marine and terrestrial  
537 species? *Journal of Applied Ecology*, **56**, 2186–2194.
- 538 Gauthier, G., Besbeas, P., Lebreton, J.-D. & Morgan, B.J.T. (2007) Population growth in  
539 snow geese: a modeling approach integrating demographic and survey information.  
540 *Ecology*, **88**, 1420–1429.
- 541 Holopainen, S., Christensen, T.K., Pöysä, H., Väänänen, V.-M., Rintala, J. & Fox, A.D.  
542 (2018) Associations between duck harvest, hunting wing ratios and measures of  
543 reproductive output in Northern Europe. *European Journal of Wildlife Research*, **64**,  
544 72.
- 545 Hutchings, J.A. & Myers, R.A. (1994) What can be learned from the collapse of a renewable  
546 resource? Atlantic cod, *Gadus morhua*, of Newfoundland and Labrador. *Canadian*  
547 *Journal of Fisheries and Aquatic Sciences*, **51**, 2126–2146.
- 548 Hutchings, J.A. & Reynolds, J.D. (2004) Marine Fish Population Collapses: Consequences  
549 for Recovery and Extinction Risk. *BioScience*, **54**, 297–309.
- 550 Kéry, M. & Schaub, M. (2012) *Bayesian Population Analysis using WinBUGS: A*  
551 *hierarchical perspective*. Academic Press, Boston.
- 552 Keuling, O., Lauterbach, K., Stier, N. & Roth, M. (2010) Hunter feedback of individually  
553 marked wild boar *Sus scrofa* L.: dispersal and efficiency of hunting in northeastern  
554 Germany. *European Journal of Wildlife Research*, **56**, 159–167.
- 555 Koons, D.N., Colchero, F., Hersey, K. & Gimenez, O. (2015) Disentangling the effects of  
556 climate, density dependence, and harvest on an iconic large herbivore's population  
557 dynamics. *Ecological Applications*, **25**, 956–967.
- 558 Lebreton, J.-D. (2005a) Age, stages, and the role of generation time in matrix models.  
559 *Ecological Modelling*, **188**, 22–29.
- 560 Lebreton, J.-D. (2005b) Dynamical and statistical models for exploited populations.  
561 *Australian & New Zealand Journal of Statistics*, **47**, 49–63.
- 562 Lebreton, J.-D., Almeras, T. & Pradel, R. (1999) Competing events, mixtures of information  
563 and multistratum recapture models. *Bird Study*, **46**, S39–46.
- 564 Lebreton, J., Nichols, J.D., Barker, R.J., Pradel, R. & Spendelov, J.A. (2009) Modeling  
565 individual animal histories with multistate capture–recapture models. *Advances in*  
566 *Ecological Research*, **41**, 87–173.
- 567 Massei, G., Kindberg, J., Licoppe, A., Gačić, D., Šprem, N., Kamler, J., Baubet, E.,  
568 Hohmann, U., Monaco, A., Ozoliņš, J., Cellina, S., Podgórski, T., Fonseca, C.,  
569 Markov, N., Pokorny, B., Rosell, C. & Náhlik, A. (2015) Wild boar populations up,  
570 numbers of hunters down? A review of trends and implications for Europe. *Pest*  
571 *Management Science*, **71**, 492–500.



- 572 Maunder, M.N. (2004) Population viability analysis based on combining Bayesian, integrated,  
573 and hierarchical analyses. *Acta Oecologica*, **26**, 85–94.
- 574 Maunder, M.N. & Punt, A.E. (2013) A review of integrated analysis in fisheries stock  
575 assessment. *Fisheries Research*, **142**, 61–74.
- 576 Methot Jr, R.D. & Wetzel, C.R. (2013) Stock synthesis: a biological and statistical framework  
577 for fish stock assessment and fishery management. *Fisheries Research*, **142**, 86–99.
- 578 Myers, R.A., Hutchings, J.A. & Barrowman, N.J. (1997) Why do fish stocks collapse? The  
579 example of cod in Atlantic Canada. *Ecological Applications*, **7**, 91–106.
- 580 Pardo, D., Barbraud, C. & Weimerskirch, H. (2014) What shall I do now? State-dependent  
581 variations of life-history traits with aging in Wandering Albatrosses. *Ecology and*  
582 *Evolution*, **4**, 474–487.
- 583 Pauly, D., Christensen, V., Gu enette, S., Pitcher, T.J., Sumaila, U.R., Walters, C.J., Watson,  
584 R. & Zeller, D. (2002) Towards sustainability in world fisheries. *Nature*, **418**, 689.
- 585 Peres, C.A. (2010) Overexploitation. *Conservation Biology for all*, pp. 107–130. Oxford  
586 University Press, Oxford.
- 587 P eron, G., Crochet, P.-A., Doherty, P.F. & Lebreton, J.-D. (2010) Studying dispersal at the  
588 landscape scale: efficient combination of population surveys and capture-recapture  
589 data. *Ecology*, **91**, 3365–3375.
- 590 Plummer, M. (2003) JAGS: A Program for Analysis of Bayesian Graphical Models Using  
591 Gibbs Sampling. *Proceedings of the 3rd International Workshop on Distributed*  
592 *Statistical Computing*, pp. 20–22. Hornik K, Leisch F, Zeileis A, Vienna, Austria.
- 593 Plummer, M. (2016) rjags: Bayesian graphical models using MCMC.
- 594 R Development Core Team. (2017) R: A language and environment for statistical computing.
- 595 Raftovich, R.V., Chandler, S.C. & Fleming, K.K. (2018) Migratory bird hunting activity and  
596 harvest during the 2016-17 and 2017-18 hunting seasons.
- 597 Ripple, W.J., Abernethy, K., Betts, M.G., Chapron, G., Dirzo, R., Galetti, M., Levi, T.,  
598 Lindsey, P.A., Macdonald, D.W., Machovina, B., Newsome, T.M., Peres, C.A.,  
599 Wallach, A.D., Wolf, C. & Young, H. (2016) Bushmeat hunting and extinction risk to  
600 the world’s mammals. *Royal Society Open Science*, **3**, 160498.
- 601 Salguero-G omez, R., Violle, C., Gimenez, O. & Childs, D. (2018) Delivering the promises of  
602 trait-based approaches to the needs of demographic approaches, and vice versa.  
603 *Functional Ecology*, **32**, 1424–1435.
- 604 Saunders, S.P., Cuthbert, F.J. & Zipkin, E.F. (2018) Evaluating population viability and  
605 efficacy of conservation management using integrated population models. *Journal of*  
606 *Applied Ecology*, **55**, 1380–1392.
- 607 Schaub, M. & Abadi, F. (2011) Integrated population models: a novel analysis framework for  
608 deeper insights into population dynamics. *Journal of Ornithology*, **152**, 227–237.

- 609 Scheuerell, M.D., Ruff, C.P., Anderson, J.H. & Beamer, E.M. (2019) An integrated  
610 population model for estimating the relative effects of natural and anthropogenic  
611 factors on a threatened population of Pacific trout. *bioRxiv*, 734996.
- 612 Schulz, K., Oļševskis, E., Staubach, C., Lamberg, K., Seržants, M., Cvetkova, S., Conraths,  
613 F.J. & Sauter-Louis, C. (2019) Epidemiological evaluation of Latvian control  
614 measures for African swine fever in wild boar on the basis of surveillance data.  
615 *Scientific Reports*, **9**, 4189.
- 616 Servanty, S., Choquet, R., Baubet, E., Brandt, S., Gaillard, J.-M., Schaub, M., Toïgo, C.,  
617 Lebreton, J.-D., Buoro, M. & Gimenez, O. (2010) Assessing whether mortality is  
618 additive using marked animals: a Bayesian state-space modeling approach. *Ecology*,  
619 **91**, 1916–1923.
- 620 Servanty, S., Gaillard, J.-M., Toïgo, C., Brandt, S. & Baubet, E. (2009) Pulsed resources and  
621 climate-induced variation in the reproductive traits of wild boar under high hunting  
622 pressure. *Journal of Animal Ecology*, **78**, 1278–1290.
- 623 Smallegange, I.M. & Berg, M.P. (2019) A functional trait approach to identifying life history  
624 patterns in stochastic environments. *Ecology and Evolution*, **9**, 9350–9361.
- 625 Toïgo, C., Servanty, S., Gaillard, J.-M., Brandt, S. & Baubet, E. (2008) Disentangling natural  
626 from hunting mortality in an intensively hunted wild boar population. *The Journal of*  
627 *Wildlife Management*, **72**, 1532–1539.
- 628 Truvé, J. & Lemel, J. (2003) Timing and distance of natal dispersal for wild boar *Sus scrofa* in  
629 Sweden. *Wildlife Biology*, **9**, 51–57.
- 630 de Valpine, P. & Hastings, A. (2002) Fitting population models incorporating process noise  
631 and observation error. *Ecological Monographs*, **72**, 57–76.
- 632 Williams, B.K., Nichols, J.D. & Conroy, M.J. (2002) *Analysis and Management of Animal*  
633 *Populations*. Academic Press, San Diego.
- 634 Zipkin, E.F. & Saunders, S.P. (2018) Synthesizing multiple data types for biological  
635 conservation using integrated population models. *Biological Conservation*, **217**, 240–  
636 250.
- 637

638 **Figure 1.** Directed acyclic graph of the IPM. Squares represent the data, circles represent the parameters to be estimated. Arrows represent  
639 dependencies. Three types of data are collected: CMRR data, hunting data ( $y_j$ ) and reproductive data (number of pregnant females ( $R$ ) and  
640 number of fetuses ( $J$ ) in each body mass class  $j$ ). Estimated parameters are the body mass-specific recapture probability  $p_j$ , recovery  
641 probability  $r_j$ , natural mortality  $NM_j$ , hunting mortality  $MH_j$ , litter size  $LS_j$ , numbers of females alive  $N_i$ , numbers of females shot by hunters  
642  $NH_j$ , breeding proportions  $BP_j$ , post-natal survival  $Spn$  (from birth to weaning), observation error  $\sigma_j^2$  and transitions between body mass  
643 classes (growth) with  $piOs$  the probability for newborn remaining in the small body mass class,  $pSS$  the probability of small females  
644 remaining in this class during the year,  $pSM$  the probability of small females entering the medium class,  $pSL$  the probability of small females  
645 entering the large class,  $pMM$  the probability of medium females remaining in this class during the year and  $pML$  the probability of medium  
646 females entering the large class.

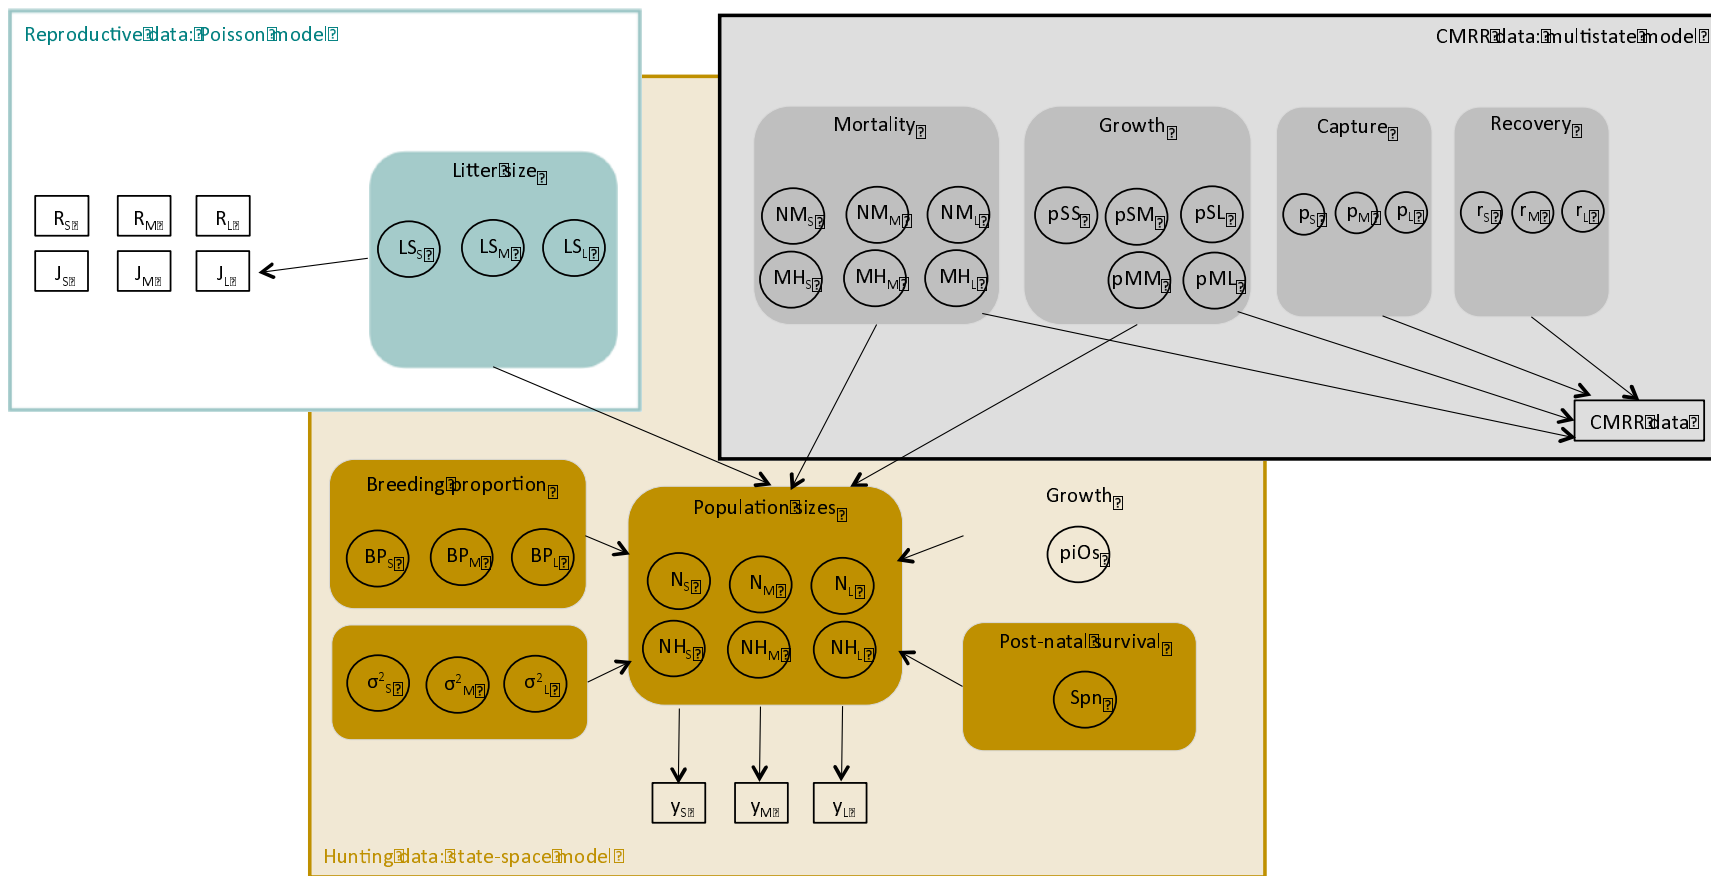

647

648

649 **Figure 2.** Mortality and growth parameters estimated with the IPM (grey part in Fig. 1). Posterior means of A) annual hunting mortality  $MH$   
650 and B) annual natural mortality  $NM$  for each body mass class (small S, medium M and large L). Posterior means of C) transition probability  
651 between body mass classes ( $p_{SS}$ : probability of small females remaining in this class;  $p_{SM}$ : probability of small females entering the medium  
652 class;  $p_{SL}$ : probability of small females entering the large class;  $p_{ML}$ : probability of medium females entering the large class during the year)  
653 for the wild boar population at Châteauvillain-Arc-en-Barrois between 1992 and 2015. CRI are not shown to improve the readability.

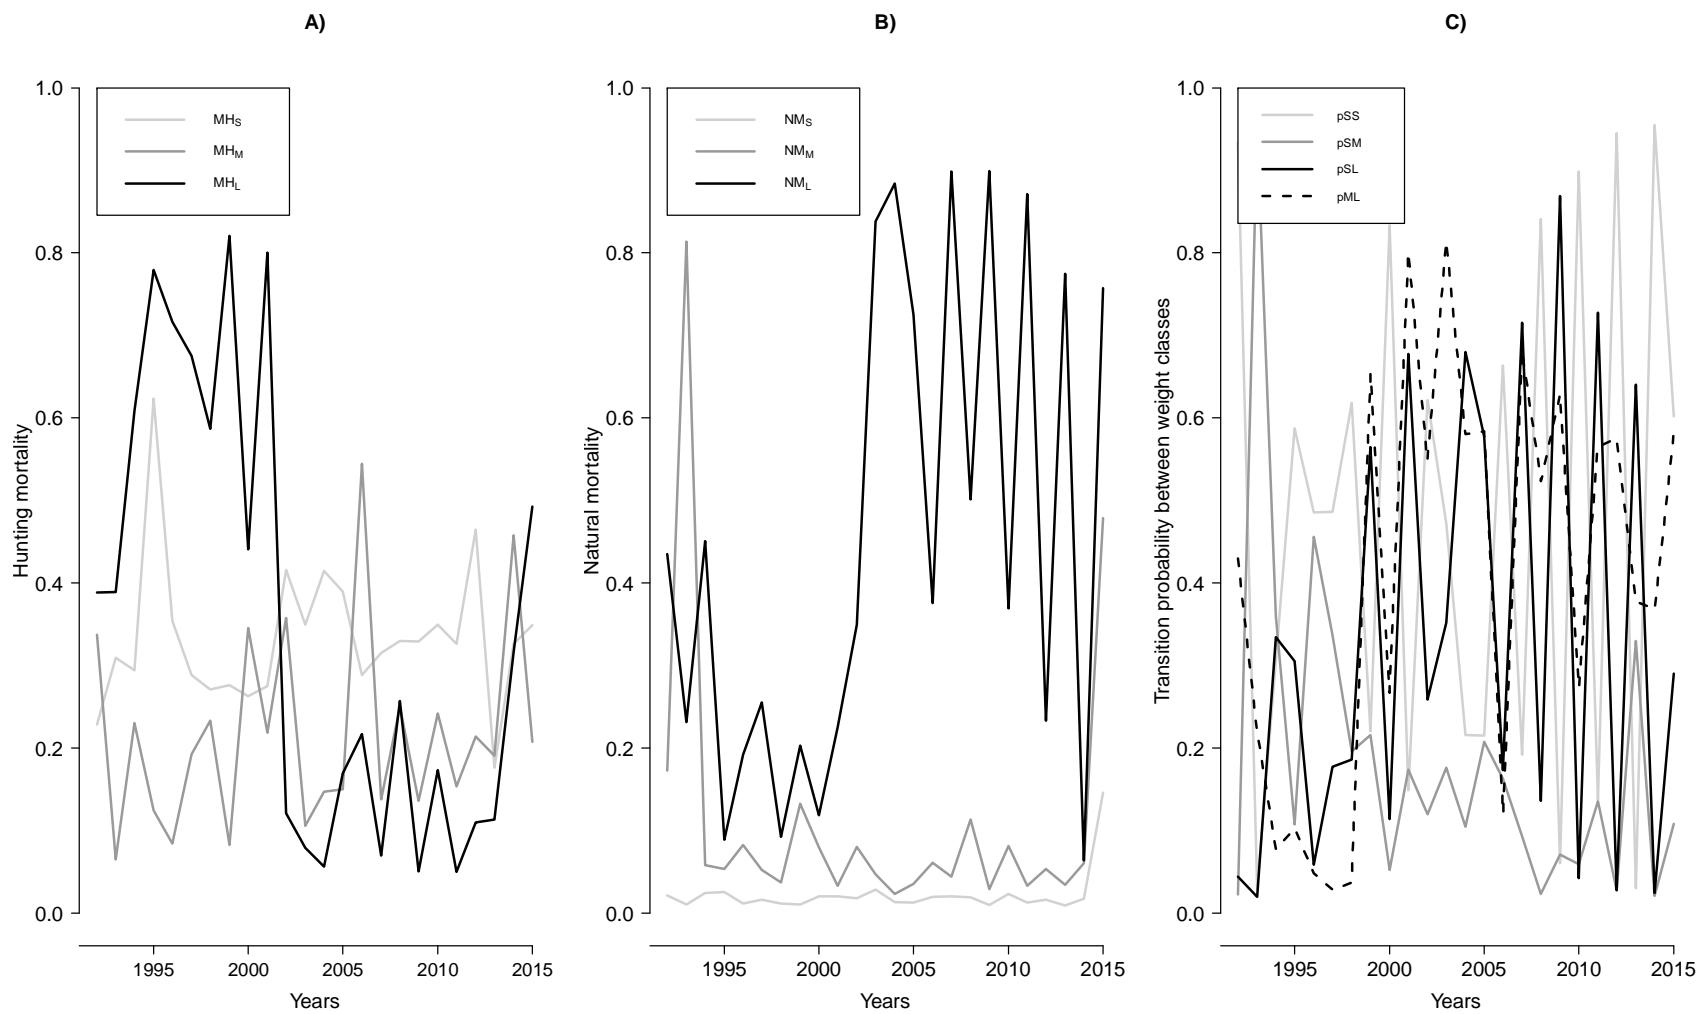

654

655

656 **Figure 3.** Reproductive parameters estimated with the IPM (blue part in Fig. 1). Posterior  
657 means of annual litter size  $LS$  for each body mass class (small S, medium M and large L)  
658 (together with their 95% CRI) for the wild boar population at Châteauvillain-Arc-en-  
659 Barrois between 1992 and 2015.

660

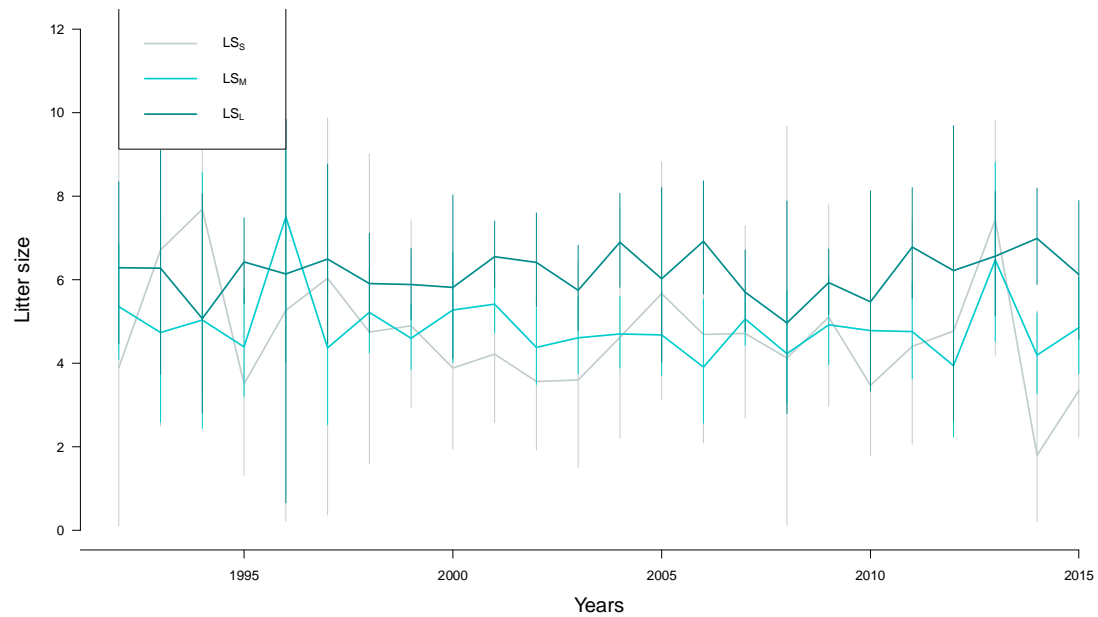

661

662 **Figure 4.** Population sizes estimated with the IPM (yellow part in Fig. 1). Posterior means (together with their 95% CRI) of A) annual  
663 numbers of females shot by hunters  $NH$  and B) annual numbers of females alive  $N$  in each body mass class (small S, medium M and large L)  
664 for the wild boar population at Châteauvillain-Arc-en-Barrois between 1992 and 2016. Dots correspond to observed numbers of females shot  
665 by hunters in the three body mass classes ( $y_S$ ,  $y_M$  and  $y_L$ ).

666

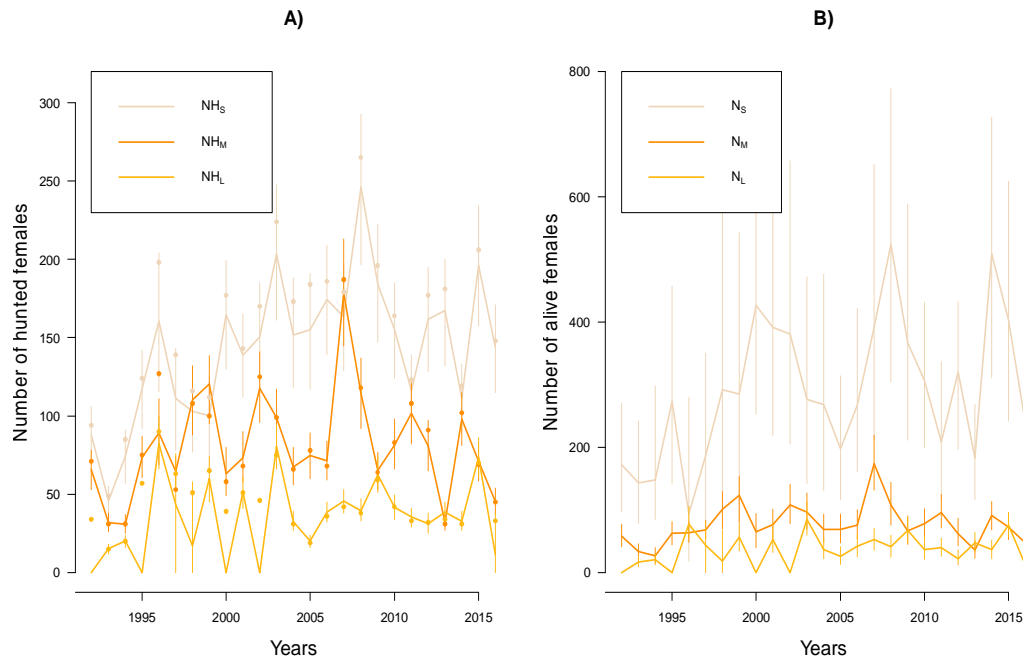

667
